# Supplementary material for: Neural representation of abstract task structure during generalization
Source: eLife journal article supplement (doi:10.7554/elife.63226), 2021-03-17
Supplement: supp [file elife-63226-supp-v1.zip]

|                 | Initial Training (phase 1) |                      |                      |                                        | New Category Training (phase 2) | Generalization (phase 3)      |                          |
|-----------------|----------------------------|----------------------|----------------------|----------------------------------------|---------------------------------|-------------------------------|--------------------------|
|                 | Initial Training 1         | Initial Training 2   | Initial Training 3   | Initial training 4 (reminder)          | New Category Training           | Generalization (mini-blocked) | Generalization (mixed)   |
| Contexts        | A1, B1, C1                 | A2, B2, C2           | A3, B3, C3           | A1, B1, C1<br>A2, B2, C2<br>A3, B3, C3 | A3, B3, C3                      | A1, B1, C1<br>A2, B2, C2      | A1, B1, C1<br>A2, B2, C2 |
| Item categories | Hands, foods, leaves       | Hands, foods, leaves | Hands, foods, leaves | Hands, foods, leaves                   | Faces, animals, objects         | Faces, animals, objects       | Faces, animals, objects  |
| Session 1       | 2 blocks x 54 trials       | 2 blocks x 54 trials | 2 blocks x 54 trials | 1 block x 216 trials                   | 1 block x 90 trials             | 1 block x 180 trials          | -                        |
| Session 2       | 2 blocks x 54 trials       | 2 blocks x 54 trials | 2 blocks x 54 trials | 1 block x 216 trials                   | 1 block x 90 trials             | 1 block x 180 trials          | 3 blocks x 180 trials    |
| Session 3       | 1 block x 54 trials        | 1 block x 54 trials  | 1 block x 54 trials  | 1 block x 216 trials                   | 1 block x 90 trials             | 1 block x 180 trials          | 3 blocks x 180 trials    |
