# Supplementary material for: Neural representation of abstract task structure during generalization
Source: eLife journal article supplement (doi:10.7554/elife.63226), 2021-03-17
Supplement: supp [file elife-63226-supp-v1.zip]

Archive with 16 entries (16 files):
- elife_poa_e63226_Transparent_Reporting_File.docx
- elife_poa_e63226_Figure_1_figure_supplement_1.pdf
- elife_poa_e63226_Figure_2_figure_supplement_1.ai
- elife_poa_e63226_Figure_2_figure_supplement_2.pdf
- elife_poa_e63226_Figure_3_figure_supplement_1.ai
- elife_poa_e63226_Figure_4_figure_supplement_1.ai
- elife_poa_e63226_Figure_5_figure_supplement_1.ai
- elife_poa_e63226_Figure_5_figure_supplement_2.psd
- elife_poa_e63226_Figure_5_figure_supplement_3.psd
- elife_poa_e63226_Figure_5_figure_supplement_4.psd
- elife_poa_e63226_Figure_5_figure_supplement_5.ai
- elife_poa_e63226_Figure_6_figure_supplement_1.psd
- elife_poa_e63226_Supplementary_file_1.docx
- elife_poa_e63226_Supplementary_file_2.docx
- elife_poa_e63226_Supplementary_file_3.docx
- elife_poa_e63226_Table_1_source_data_1.csv
