# Supplementary material for: Neural representation of abstract task structure during generalization
Source: eLife journal article supplement (doi:10.7554/elife.63226), 2021-03-17
Supplement: supp [file elife-63226-supp-v1.zip › elife_poa_e63226_Supplementary_file_3.docx]

**Supplementary Table 3. Activations passing permutation-based cluster correction for univariate contrast of correct and erroneous responses**

| Region (AAL2) | MNI Coordinates | | | Number of voxels | Peak *t*-value |
| --- | --- | --- | --- | --- | --- |
|  | x | y | z |  |  |
| **Correct > error**  (k = 317) |  |  |  |  |  |
| Right hippocampus | 40.5 | -22 | -17.5 | 576 | 4.56 |
| Left superior temporal gyrus | -61.5 | -26.5 | 5 | 22560 | 6.79 |
| Left medial orbital gyrus | -7.5 | 48.5 | -14.5 | 558 | 4.92 |
| Right middle temporal gyrus | 40.5 | -40 | -8.5 | 349 | 4.70 |
