# Supplementary material for: Neural representation of abstract task structure during generalization
Source: eLife journal article supplement (doi:10.7554/elife.63226), 2021-03-17
Supplement: supp [file elife-63226-supp-v1.zip › elife_poa_e63226_Table_1_source_data_1.csv]

subject	CAR	ARI	LS	HLS	session	group (fMRI = 2, beh = 1)
1303	244.8316941	227.8511401	245.8830857	203.0087521	1	2
1304	100.8170113	90.41477439	90.43374157	90.741755	1	2
1305	201.5219587	211.6686825	226.3175958	182.8713969	1	2
1308	227.4541192	219.2379244	209.425919	185.6391598	1	2
1310	232.4817244	206.1524961	225.3348566	178.4650485	1	2
1316	222.9556008	202.6387811	211.0063093	189.2067321	1	2
1317	253.5820164	217.8300397	222.9394811	211.0758934	1	2
1326	246.1210087	204.1643922	232.035405	191.2907579	1	2
1329	251.0529687	195.3165214	223.006089	185.2739152	1	2
1335	198.5384666	196.221119	196.9505312	193.5225886	1	2
1336	227.074362	221.5576354	231.4005774	213.599377	1	2
1337	189.4343764	136.1864204	169.480173	171.4952685	1	2
1342	253.1994377	233.3933197	248.1654856	230.1955316	1	2
1343	263.7452072	256.5053009	258.0914649	245.1736037	1	2
1345	192.7204987	211.1737081	213.1873544	194.153068	1	2
1350	232.236058	197.0667885	224.5805353	195.3324158	1	2
1303	269.9908372	258.2667746	259.1449772	245.0709426	2	2
1304	232.8190281	196.3543716	220.5135792	217.2876931	2	2
1305	229.8050389	203.8594633	247.3936638	195.6362331	2	2
1308	264.1789444	257.3929746	258.9395734	247.1899712	2	2
1310	247.8100777	195.4467762	217.36099	197.2289267	2	2
1316	235.7782333	219.4571618	261.2346252	196.0646781	2	2
1317	291.6894378	272.6091025	286.3536277	270.6437015	2	2
1326	211.9034089	176.6813803	173.3022848	152.7849905	2	2
1329	274.5081909	234.2388421	234.4929023	225.2633491	2	2
1335	230.4122678	234.907262	234.5541824	228.7553942	2	2
1336	247.8159233	203.9469434	198.6657649	179.55134	2	2
1337	192.8065856	174.7061414	173.0621596	170.3334723	2	2
1342	257.8520571	249.059973	259.5863397	236.7002239	2	2
1343	257.5619874	228.7824998	198.6710424	179.0637416	2	2
1345	189.2578283	118.9517359	129.418913	124.4222283	2	2
1350	215.4142676	188.5458208	216.4078321	198.1380993	2	2
1306	201.4978443	174.054916	166.0971891	163.5815949	2	1
1312	236.8833694	215.9228859	221.9720591	176.9789951	2	1
1318	264.9837208	252.5225386	255.7578329	238.3133282	2	1
1320	247.1182083	186.8817933	219.9115313	174.798869	2	1
1322	233.9383613	219.6709943	216.9774555	205.1106817	2	1
1324	228.7108296	171.8553746	202.5680957	154.7710253	2	1
1334	230.4400925	230.2964894	230.2578706	228.3521858	2	1
1339	213.599583	210.1172671	208.4336422	192.5589673	2	1
1349	206.4819878	190.4346317	199.6340532	179.2608929	2	1
