# Supplementary figures and images for: Neural representation of abstract task structure during generalization
Source: eLife journal article supplement (doi:10.7554/elife.63226), 2021-03-17

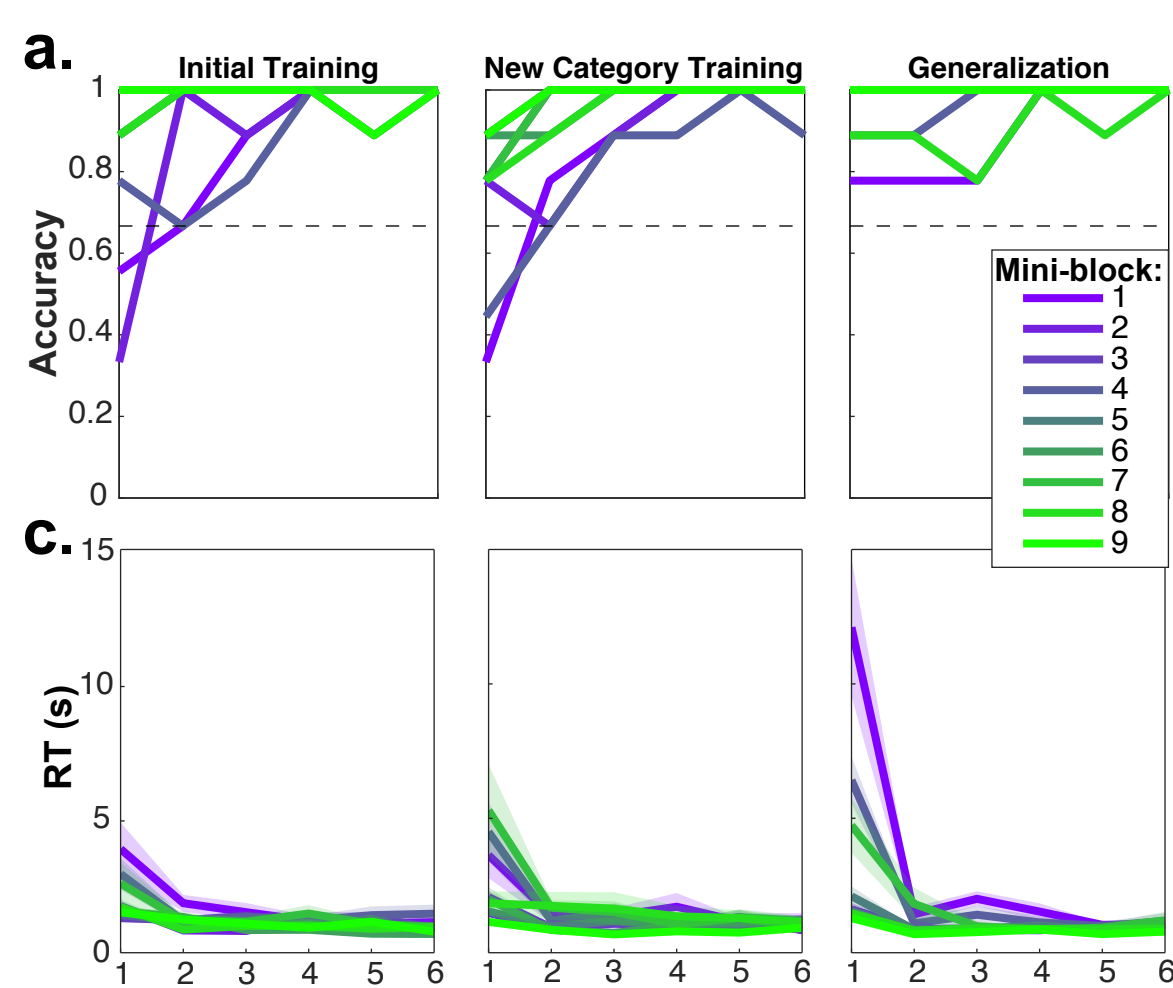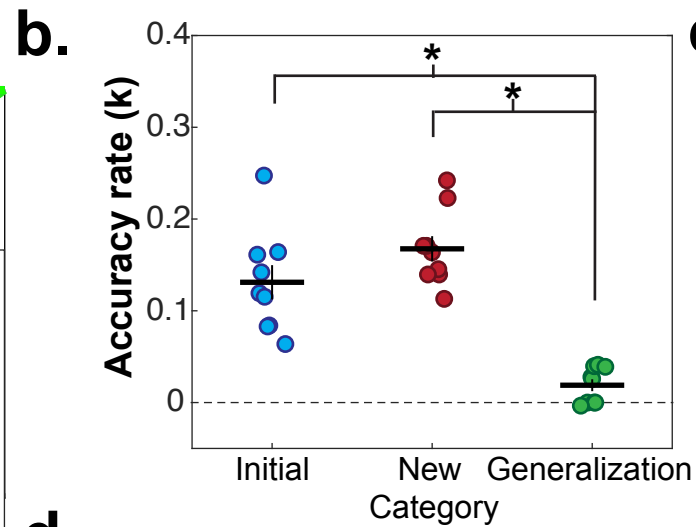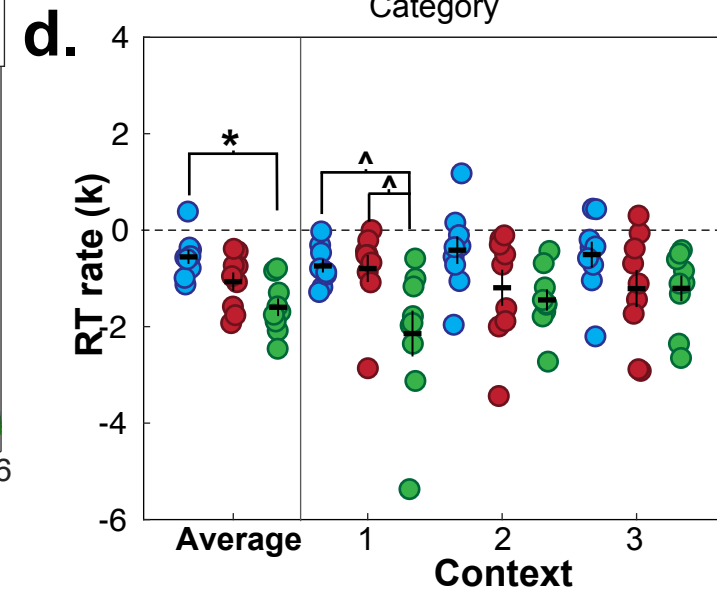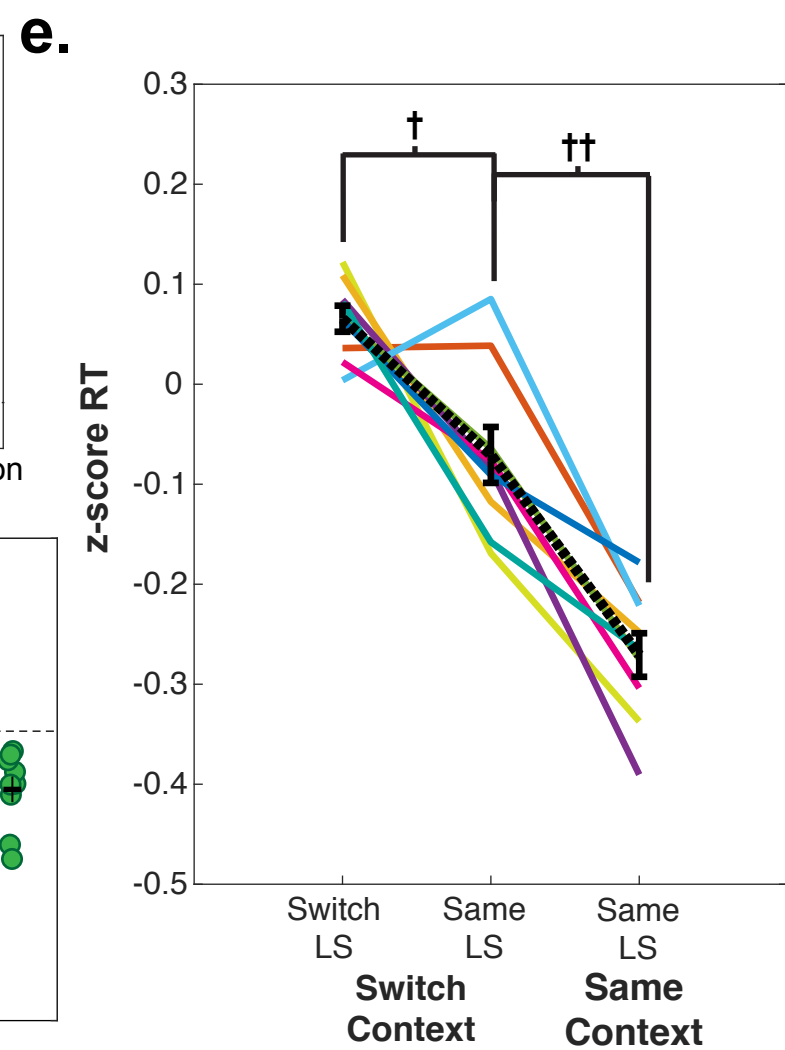

Supplement: supp [file elife-63226-supp-v1.zip]
